# Supplementary material for: Seasonal hotspots of leatherback turtle bycatch in the Atlantic Ocean: Insights from longline observer data
Source: Research Square preprint supplement (doi:10.21203/rs.3.rs-6545094/v1), 2025-05-13
Supplement: Supplementary file 1 [file 857331c077c658bbab657b7e.docx]

Seasonal hotspots of leatherback turtle bycatch in the Atlantic Ocean: Insights from longline observer data.

Makoto Nishimoto1*, Shintaro Ueno1, Kei Okamoto1, Hirotaka Ijima1, Daisuke Ochi1

*Corresponding author: Makoto Nishimoto.

**Supplementary material**

**Table S1.** Posterior distribution of hyper parameters for the negative binomial model in (a) Q1 and (b) Q4. In these tables, Range and Stdev are the range of spatial correlation and the standard deviation of the spatial random effect, respectively. GroupRho is the strength of the annual temporal autocorrelation for spatiotemporal random effect.

(a)

| Parameters | mean | sd | 0.025quant | 0.5quant | 0.975quant |
| --- | --- | --- | --- | --- | --- |
| size for nbinomial zero-inflated observations | 29.081 | 30.995 | 4.806 | 19.897 | 110.168 |
| zero-probability parameter for zero-inflated nbinomial | 0.663 | 0.042 | 0.570 | 0.667 | 0.734 |
| Range for s | 4197.113 | 886.038 | 2848.414 | 4064.655 | 6315.289 |
| Stdev for s | 1.372 | 0.349 | 0.856 | 1.315 | 2.221 |
| Range for x | 2900.080 | 1750.301 | 698.344 | 2516.753 | 7339.838 |
| Stdev for x | 0.232 | 0.079 | 0.116 | 0.219 | 0.425 |
| GroupRho for x | 0.846 | 0.022 | 0.796 | 0.849 | 0.881 |

(b)

| Parameters | mean | sd | 0.025quant | 0.5quant | 0.975quant |
| --- | --- | --- | --- | --- | --- |
| size for nbinomial zero-inflated observations | 21.791 | 10.742 | 8.343 | 19.377 | 49.394 |
| zero-probability parameter for zero-inflated nbinomial | 0.322 | 0.051 | 0.229 | 0.319 | 0.431 |
| Range for s | 4345.686 | 2008.903 | 1584.107 | 3969.078 | 9324.532 |
| Stdev for s | 1.149 | 0.372 | 0.584 | 1.095 | 2.032 |
| Range for x | 4675.234 | 1862.805 | 2041.932 | 4342.255 | 9252.114 |
| Stdev for x | 0.718 | 0.216 | 0.380 | 0.690 | 1.222 |
| GroupRho for x | 0.702 | 0.122 | 0.408 | 0.722 | 0.880 |

(a)


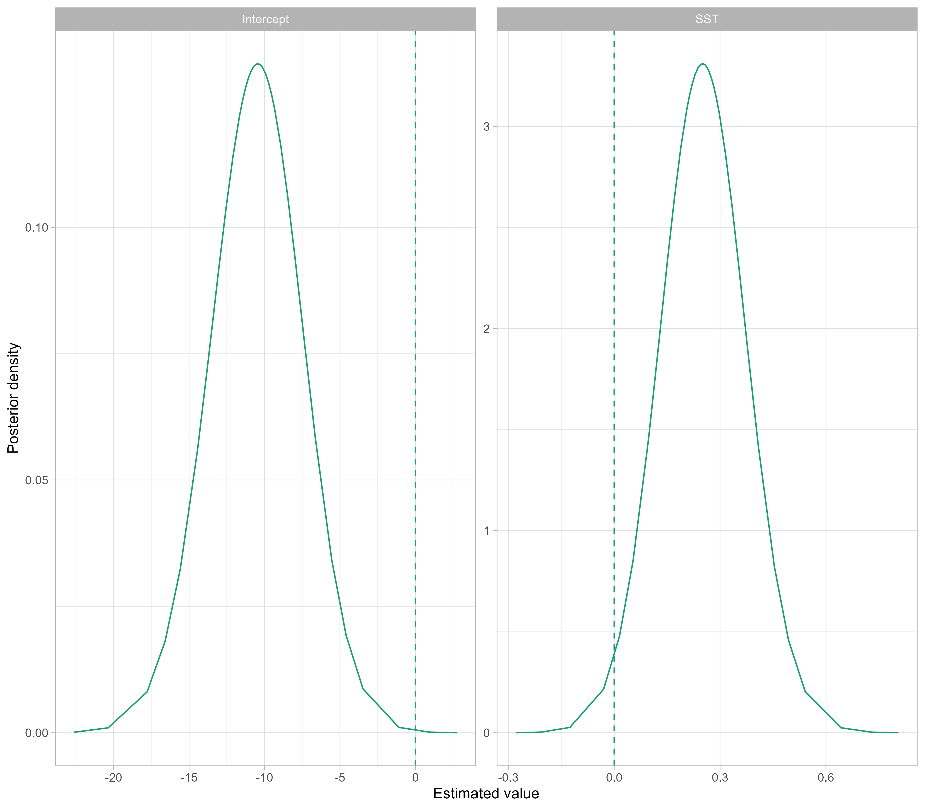


(b)


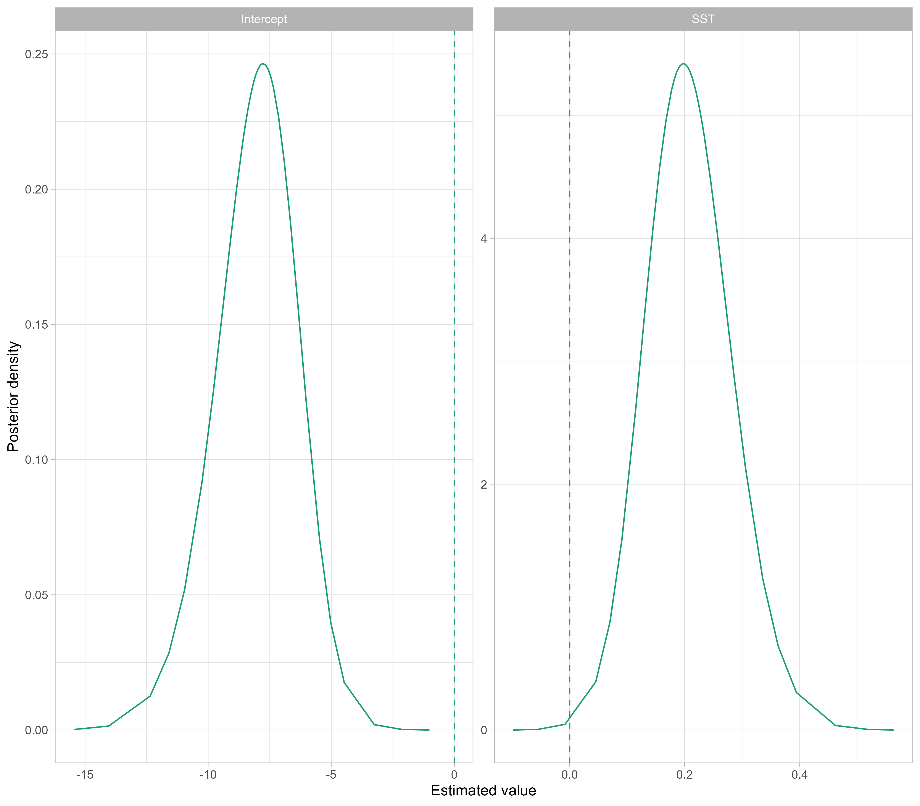


**Figure S1.** Posterior distribution of fixed effects parameters for each dataset in (a) Q1 and (b) Q4. In these figures, w is the parameter for SST, and intercept in the hurdle gamma model, respectively.

(a)


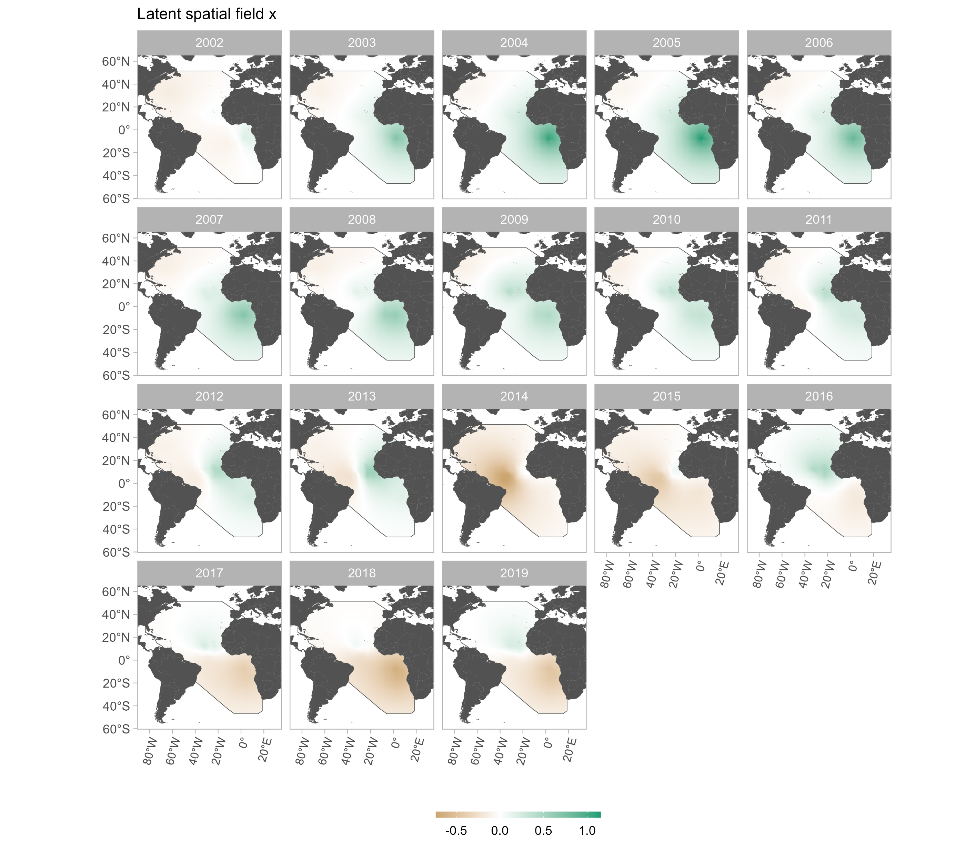


(b)


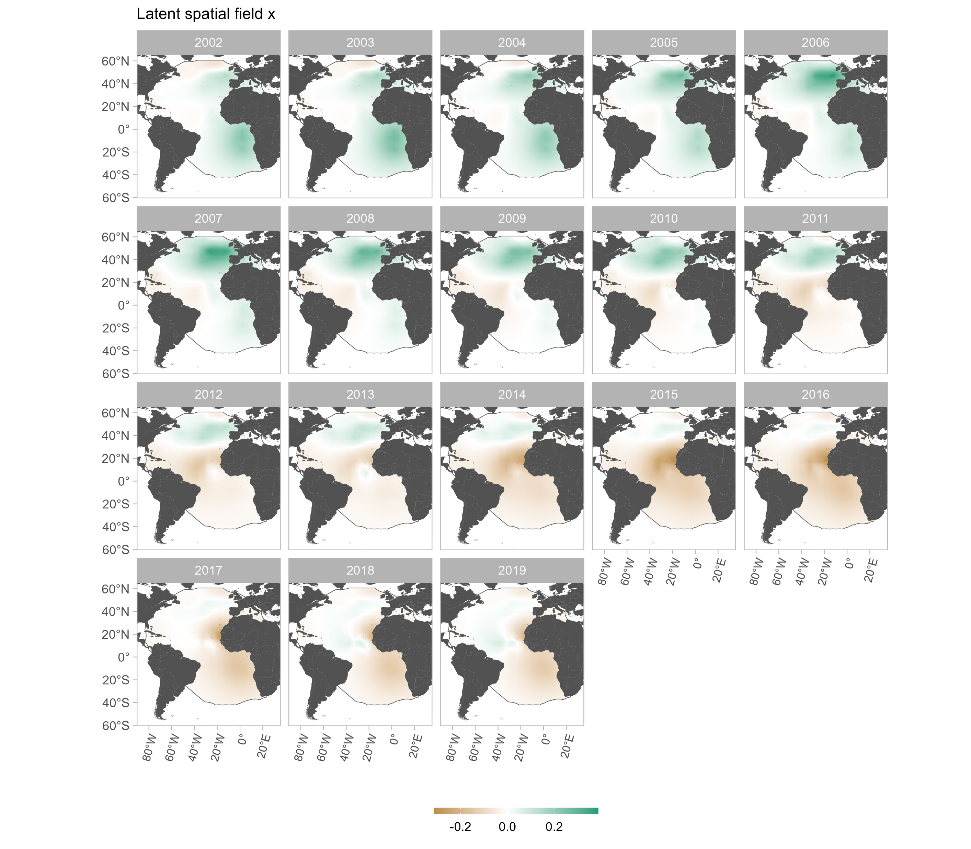


**Figure S2.** Changes over time in the spatial distribution of latent spatial fields ***x*** in (a) Q1 and (b) Q4.

(a)


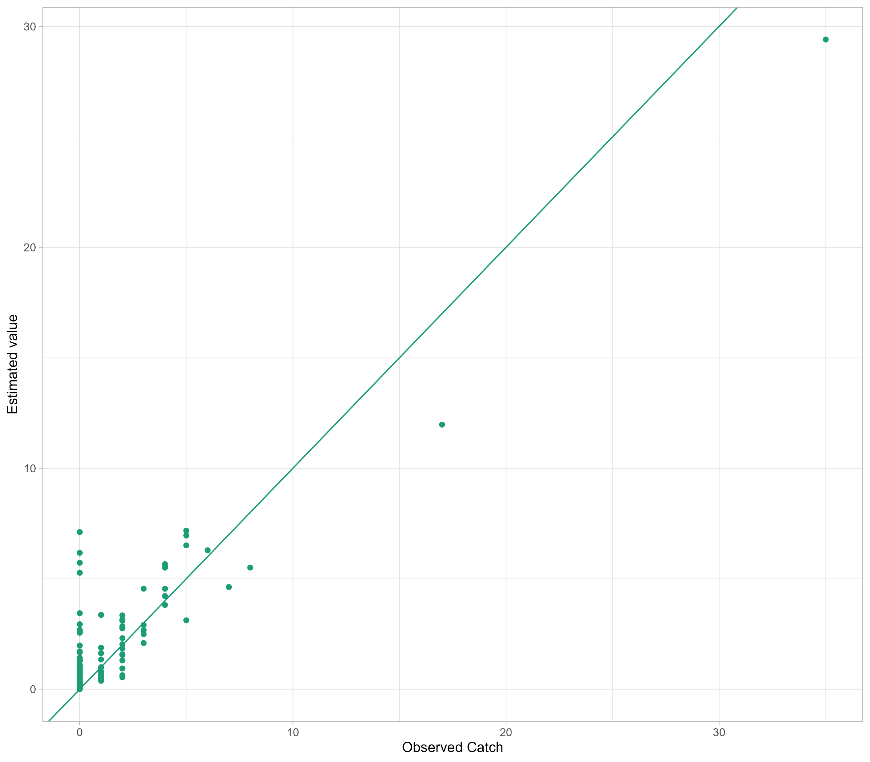


(b)


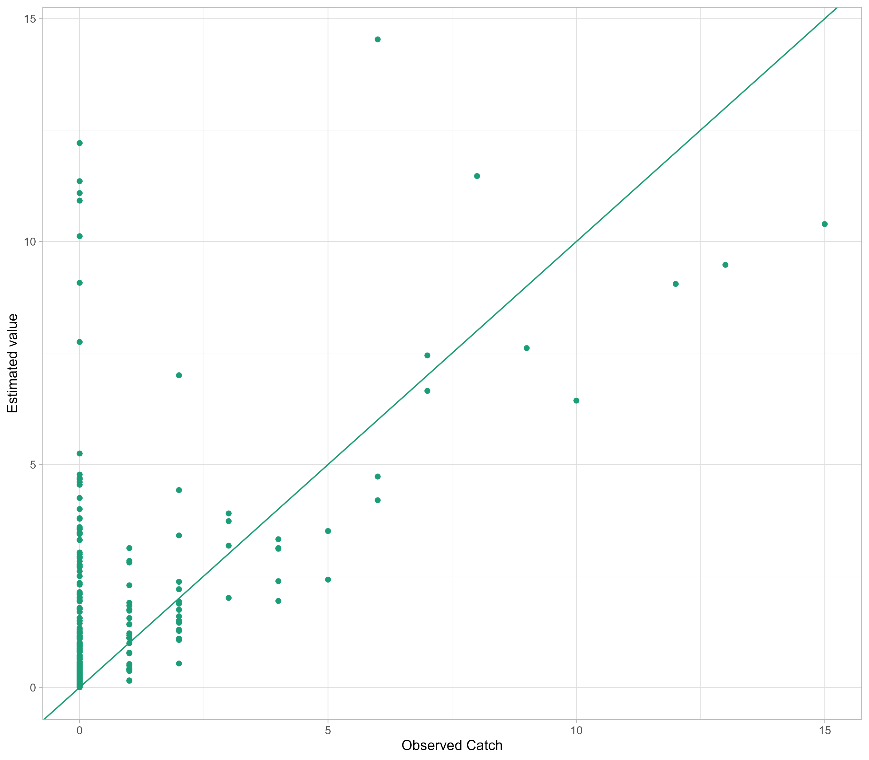


**Figure S3.** Relationship between observed and predicted CPUE in (a) Q1and (b) Q4. The solid line in the figure is y=x, which usually indicates that the model fits well when the observed and predicted values do not deviate greatly from this straight line. It should be noted, however, that since we are using a zero-inflated model and are estimating with a false-negative of 0, this is true for the non-zero observed values, and it is natural for the predictions to be larger than the observed values with respect to the zero places.

(a)


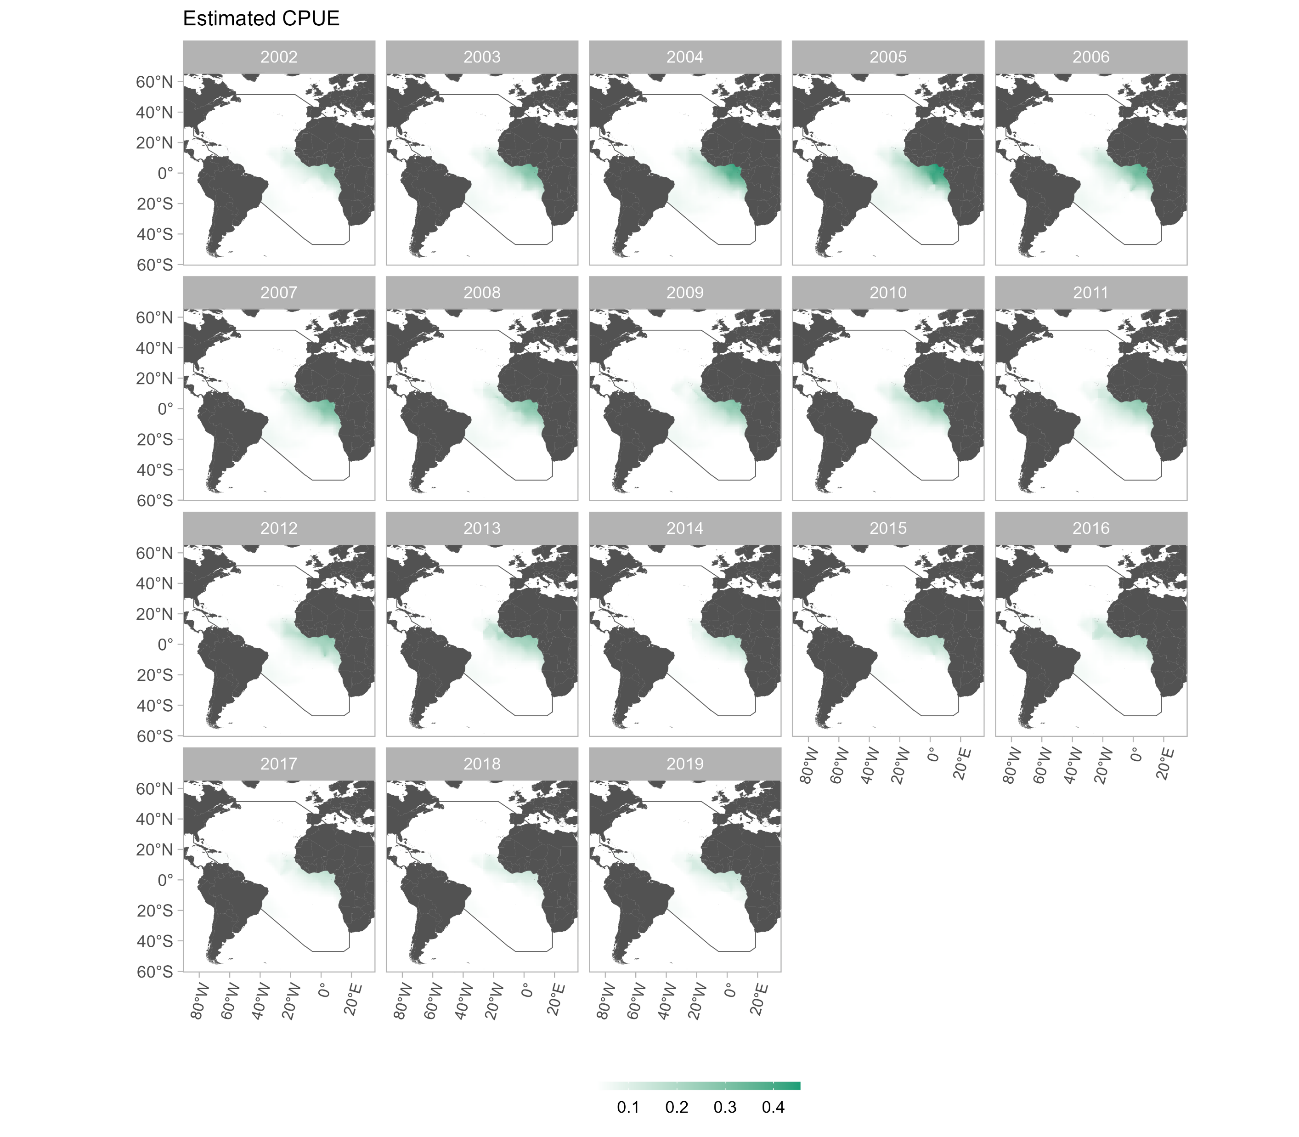


(b)


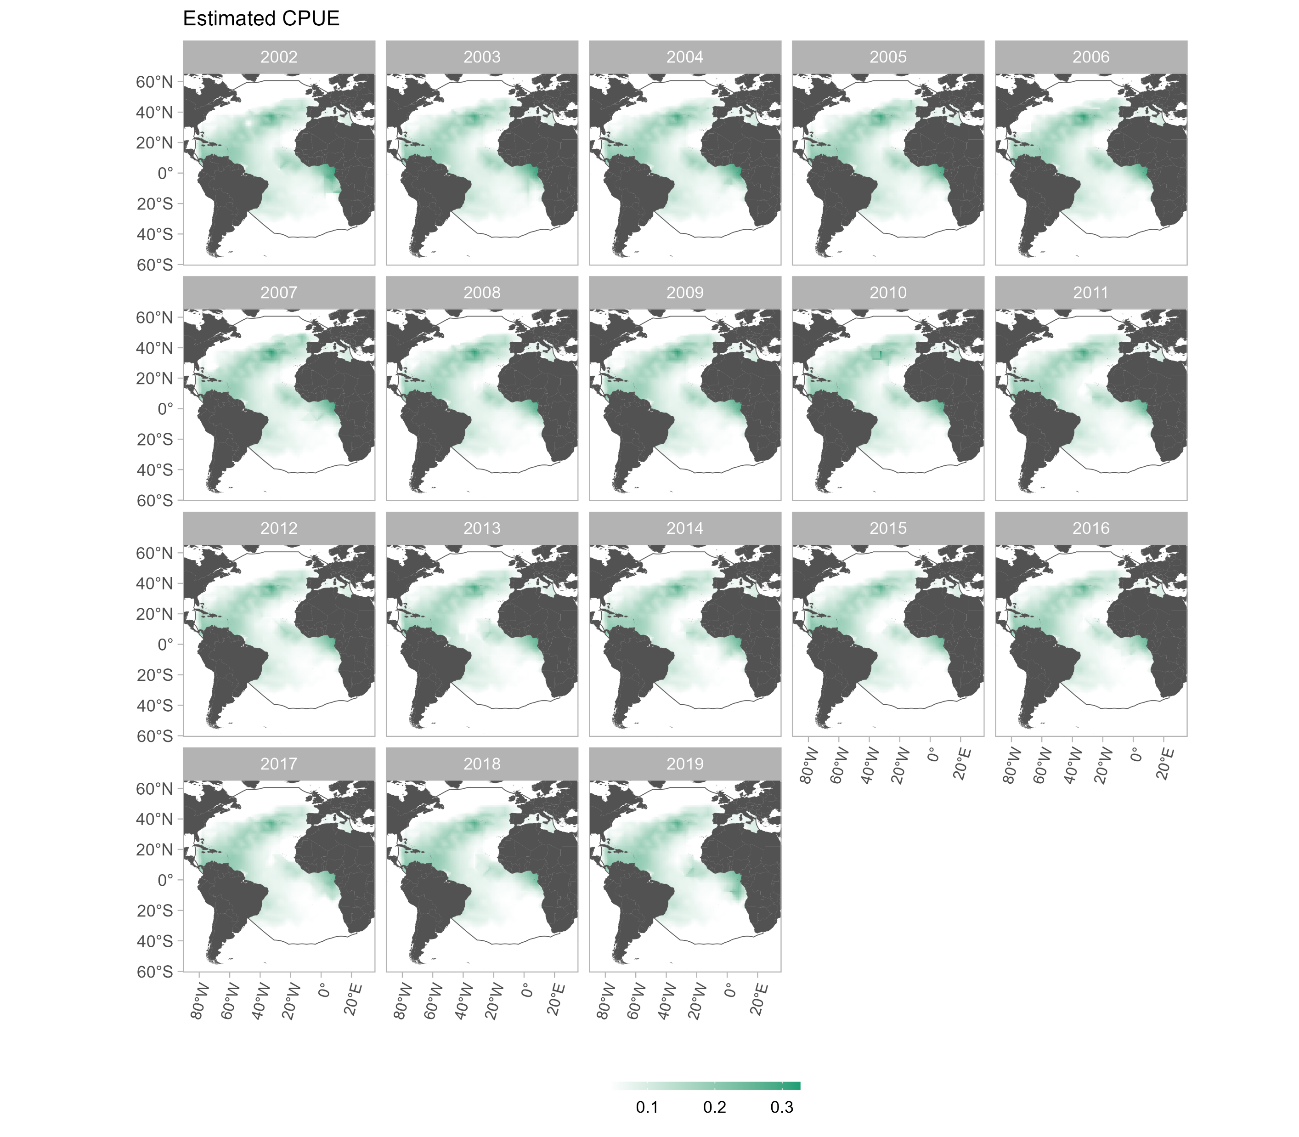


**Figure S4.** Spatiotemporal patterns of estimated relative abundance in (a) Q1 and (b) Q4. The extent of the inner mesh including the observation points in figure 1 is shown in the figure to match the distribution limits of leatherback turtles.

(a)


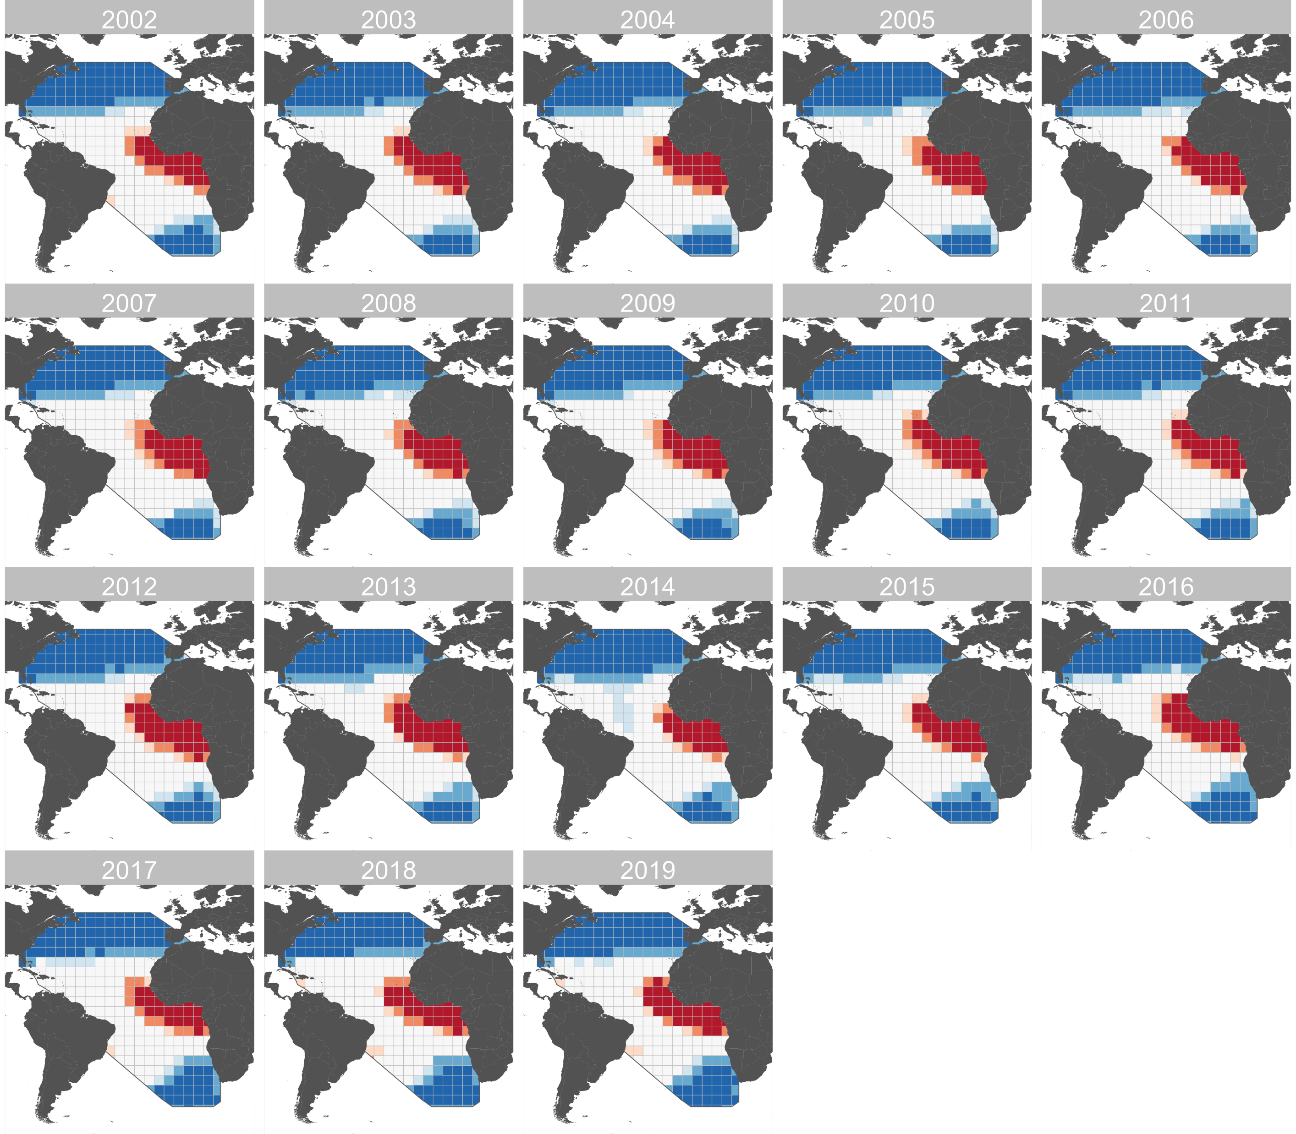


(b)


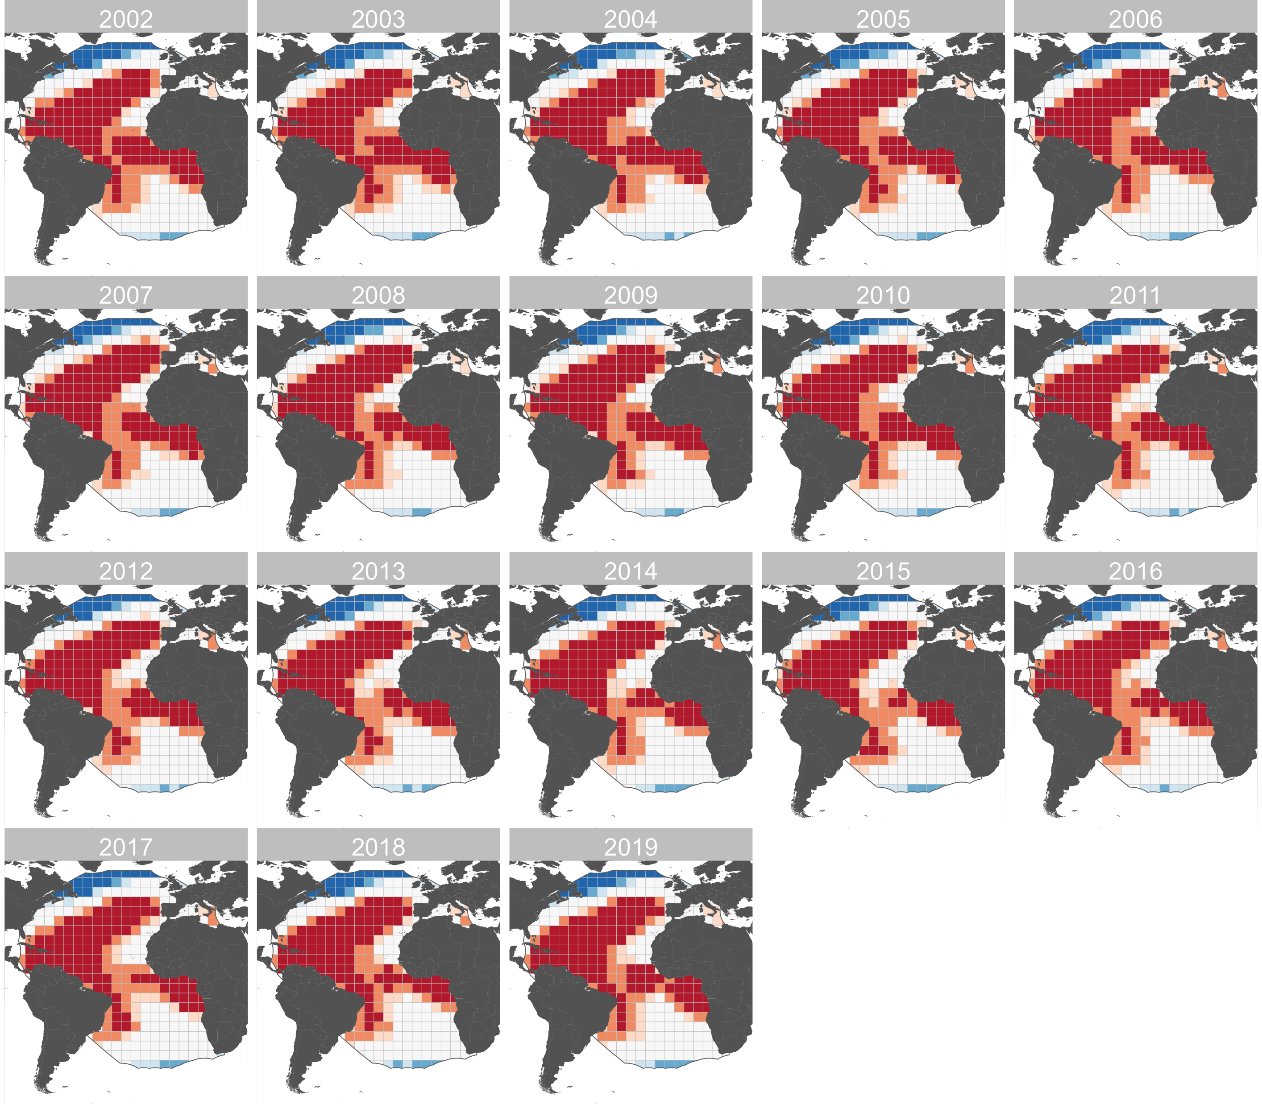


**Figure S5** Spatiotemporal patterns of potential bycatch hot spots in (a) Q1 and (b) Q4. Red areas indicate hotspots at risk of bycatch and blue areas indicate cold spots where the risk is lower than elsewhere.

(a)


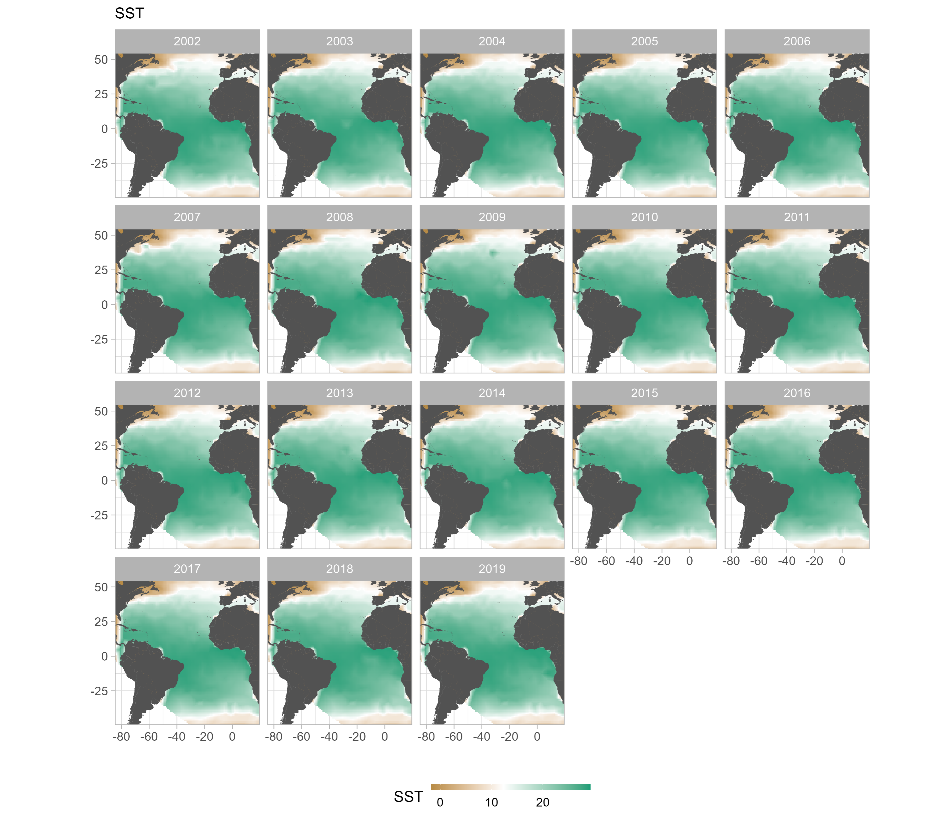


(b)


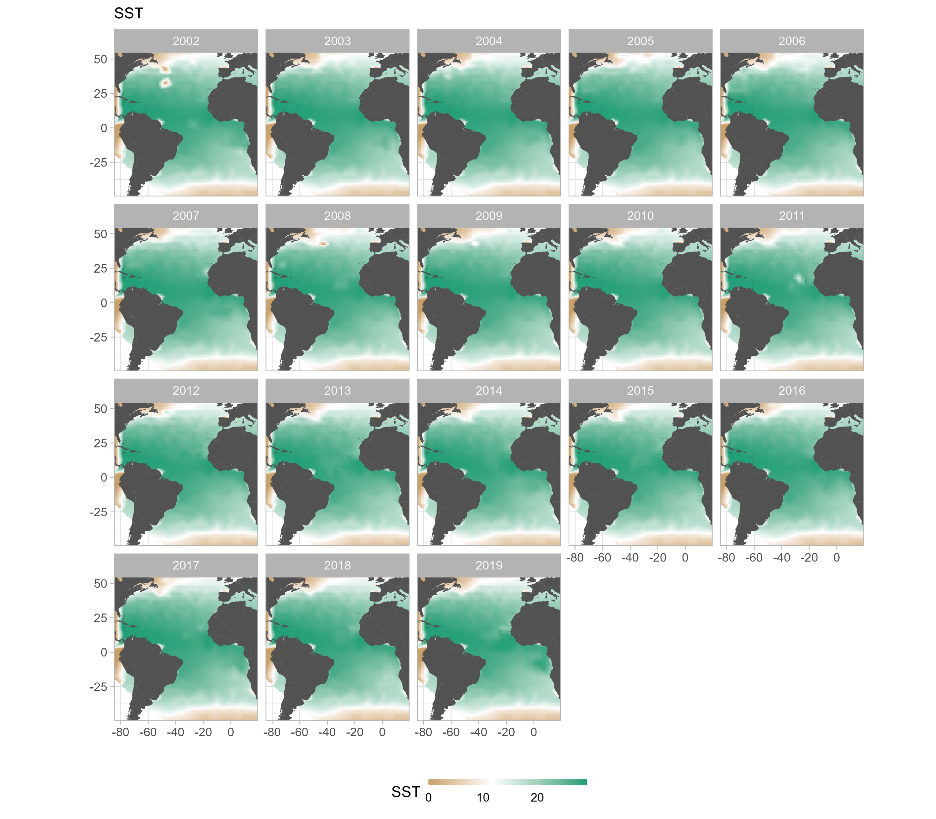


**Figure S6.** Spatial distribution of (a) Q1 and (b) Q4 for sea surface temperature data from 2002 to 2019.
